# Supplementary material for: A computational investigation of the UiO-66 confinement effect on copper clusters: the initial hydrogenation of CO 2
Source: Royal Society of Chemistry journal article supplement (doi:10.1039/d5nr04154f), 2026-01-01
Supplement: d5nr04154f1.pdf [file d5nr04154f1.pdf]

## ***Supporting Information***

### **Computational investigation of UiO-66 confinement effect on copper clusters: initial hydrogenation of CO<sub>2</sub>**

Zechen Ye,<sup>a</sup> Wenxuan Xie,<sup>b</sup> Hongyan Chen<sup>c\*</sup>, Sibudjing Kawi,<sup>a\*</sup>

<sup>a</sup> *Department of Chemical and Biomolecular Engineering, National University of Singapore, 117576, Singapore*

<sup>b</sup> *Waste Water Treatment Plant, Yuancheng district, Heyuan 517099, China*

<sup>c</sup> *School of Chemistry and Materials Engineering, Huizhou University, Huizhou 516007, China*

\*Corresponding author: [chenhy@hzu.edu.cn](mailto:chenhy@hzu.edu.cn), [chekawis@nus.edu.sg](mailto:chekawis@nus.edu.sg)

#### **Table of Contents**

|                                         |    |
|-----------------------------------------|----|
| S1. CO <sub>2</sub> hydrogenation.....  | 2  |
| S2. Selection of active sites.....      | 10 |
| S3. Validations of input parameter..... | 13 |
| S4. References.....                     | 14 |

## S1. CO<sub>2</sub> hydrogenation

(A)

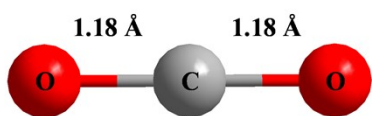

(B)

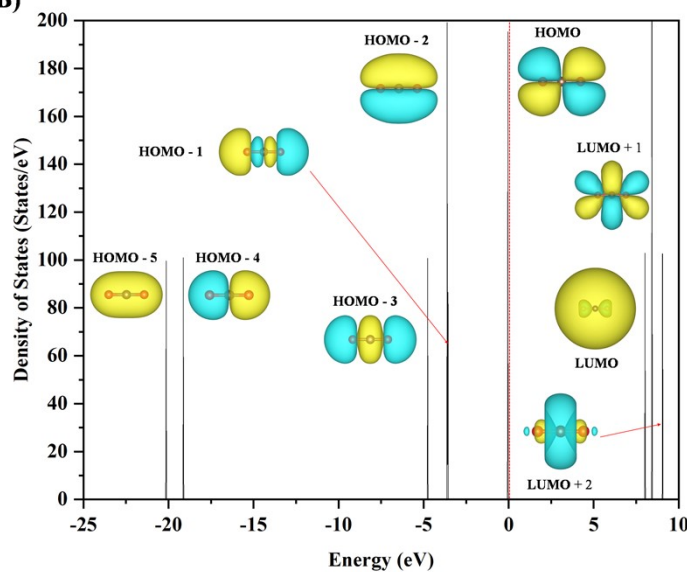

**Figure S1.** The (A) optimized structure with key bond distance in Å and (B) density of states (DOS) of CO<sub>2</sub> in gas phase.

**Table S1.** Adsorption energy of H\* on catalyst surface  $\Delta E_H$  obtained using equation:  $\Delta E_H = E - E_{\text{catalyst}} - E_H$ , where  $E$ ,  $E_{\text{catalyst}}$  and  $E_H$  are electronic energies of adsorption system, catalyst and gas-phase H atom, as well as d-band center ( $\epsilon_d$ ) of Cu<sub>8</sub>, Cu<sub>16</sub>, Cu<sub>8</sub>@UiO-66 and Cu<sub>16</sub>@UiO-66.

| Catalyst                               | Cu <sub>8</sub> | Cu <sub>16</sub> | Cu <sub>8</sub> @UiO-66 | Cu <sub>16</sub> @UiO-66 |
|----------------------------------------|-----------------|------------------|-------------------------|--------------------------|
| $\Delta E_H$ (kcal mol <sup>-1</sup> ) | -47.01          | -57.52           | -61.42                  | -63.70                   |
| $\epsilon_d$ (eV)                      | -1.26           | -1.88            | -1.86                   | -1.99                    |

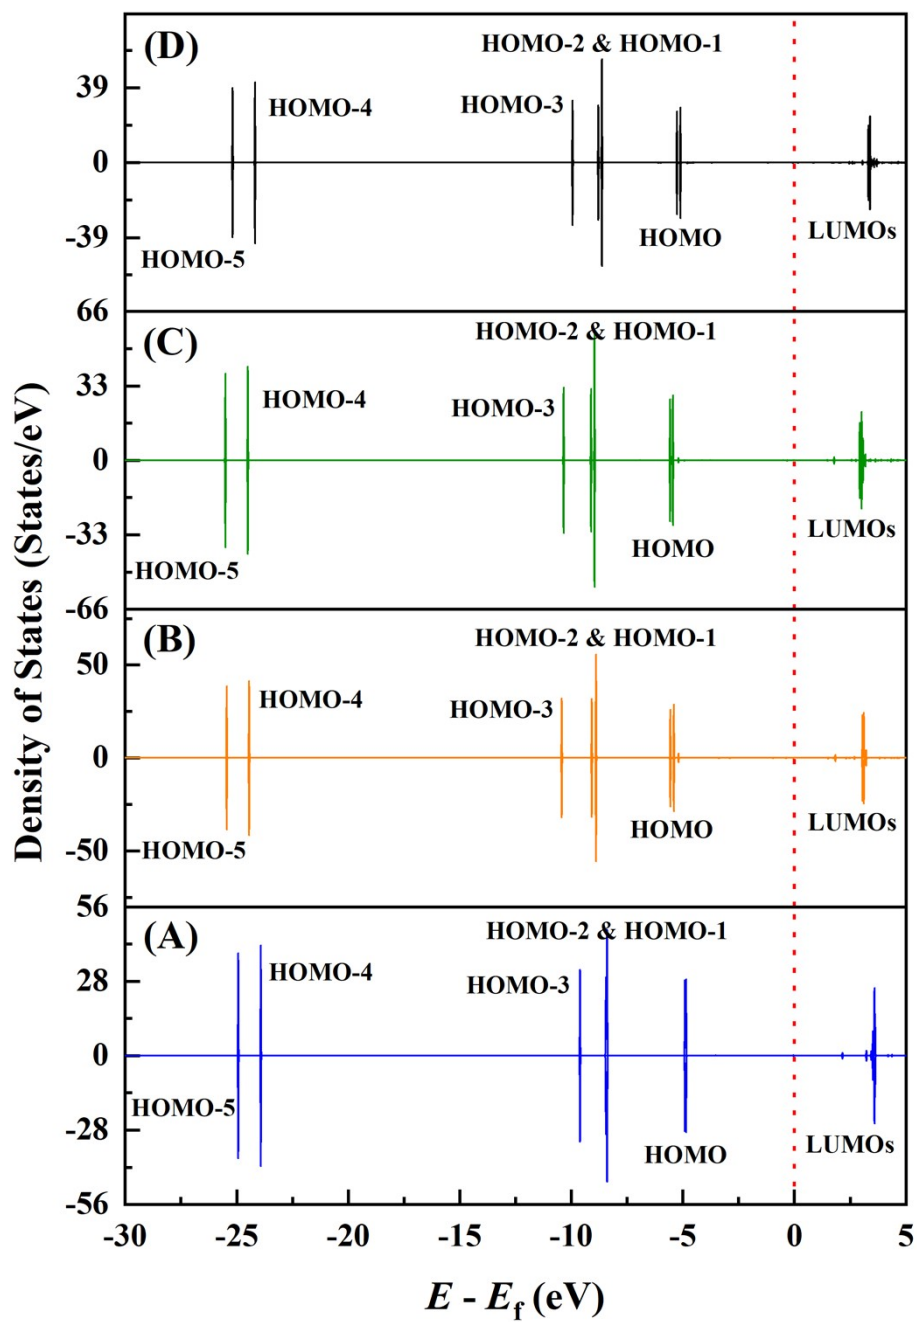

**Figure S2.** The density of states (DOS) of CO<sub>2</sub> on non-confined (A) Cu<sub>4</sub>, (B) Cu<sub>8</sub>, (C) Cu<sub>16</sub> and (D) Cu<sub>32</sub>.

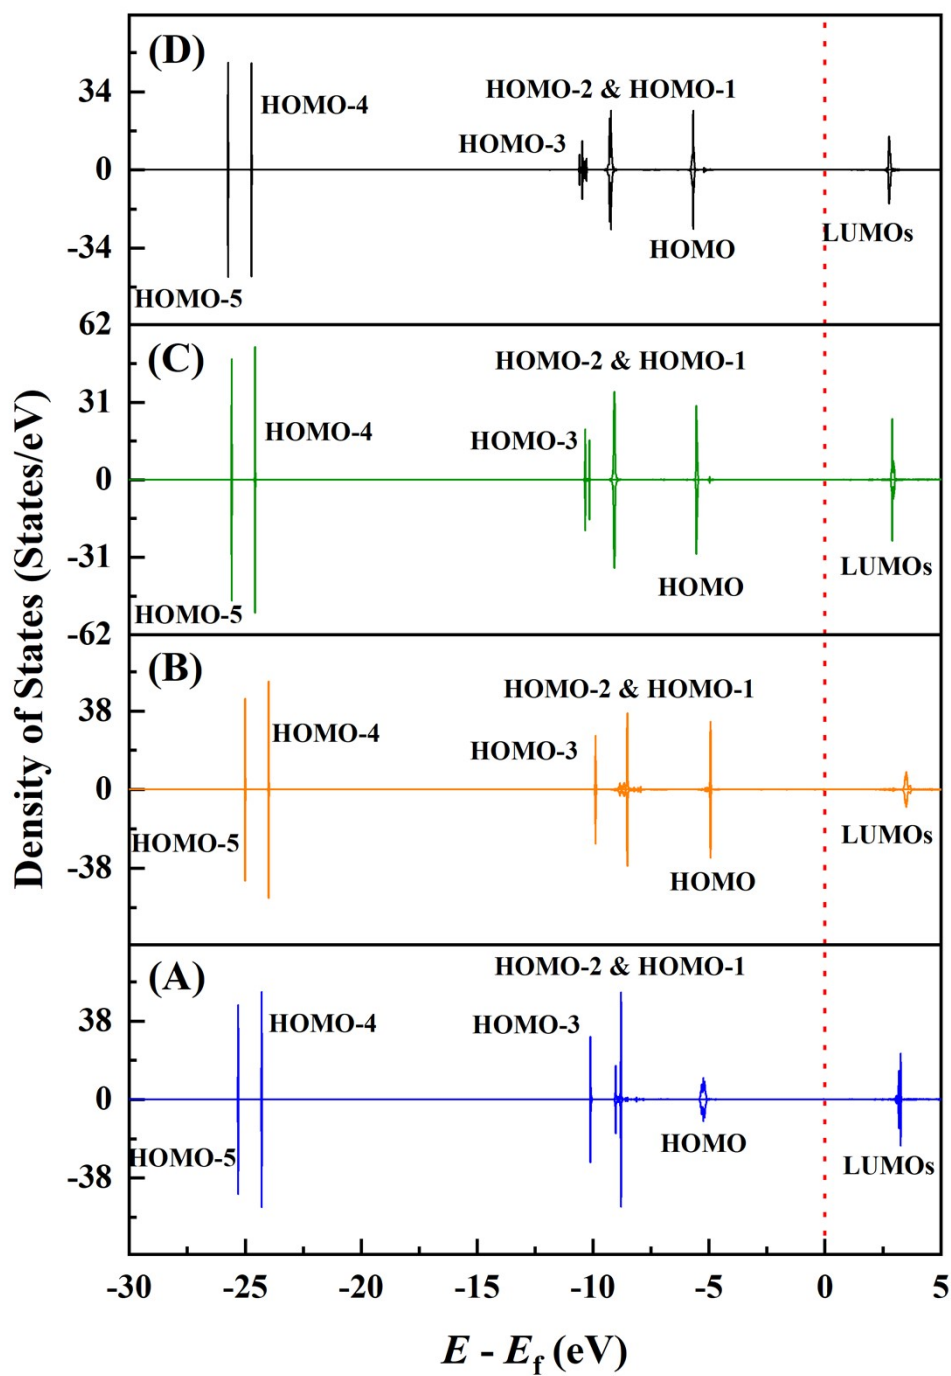

**Figure S3.** The density of states (DOS) of CO<sub>2</sub> on Uio-66-confined (A) Cu<sub>4</sub>, (B) Cu<sub>8</sub>, (C) Cu<sub>16</sub> and (D) Cu<sub>32</sub>.

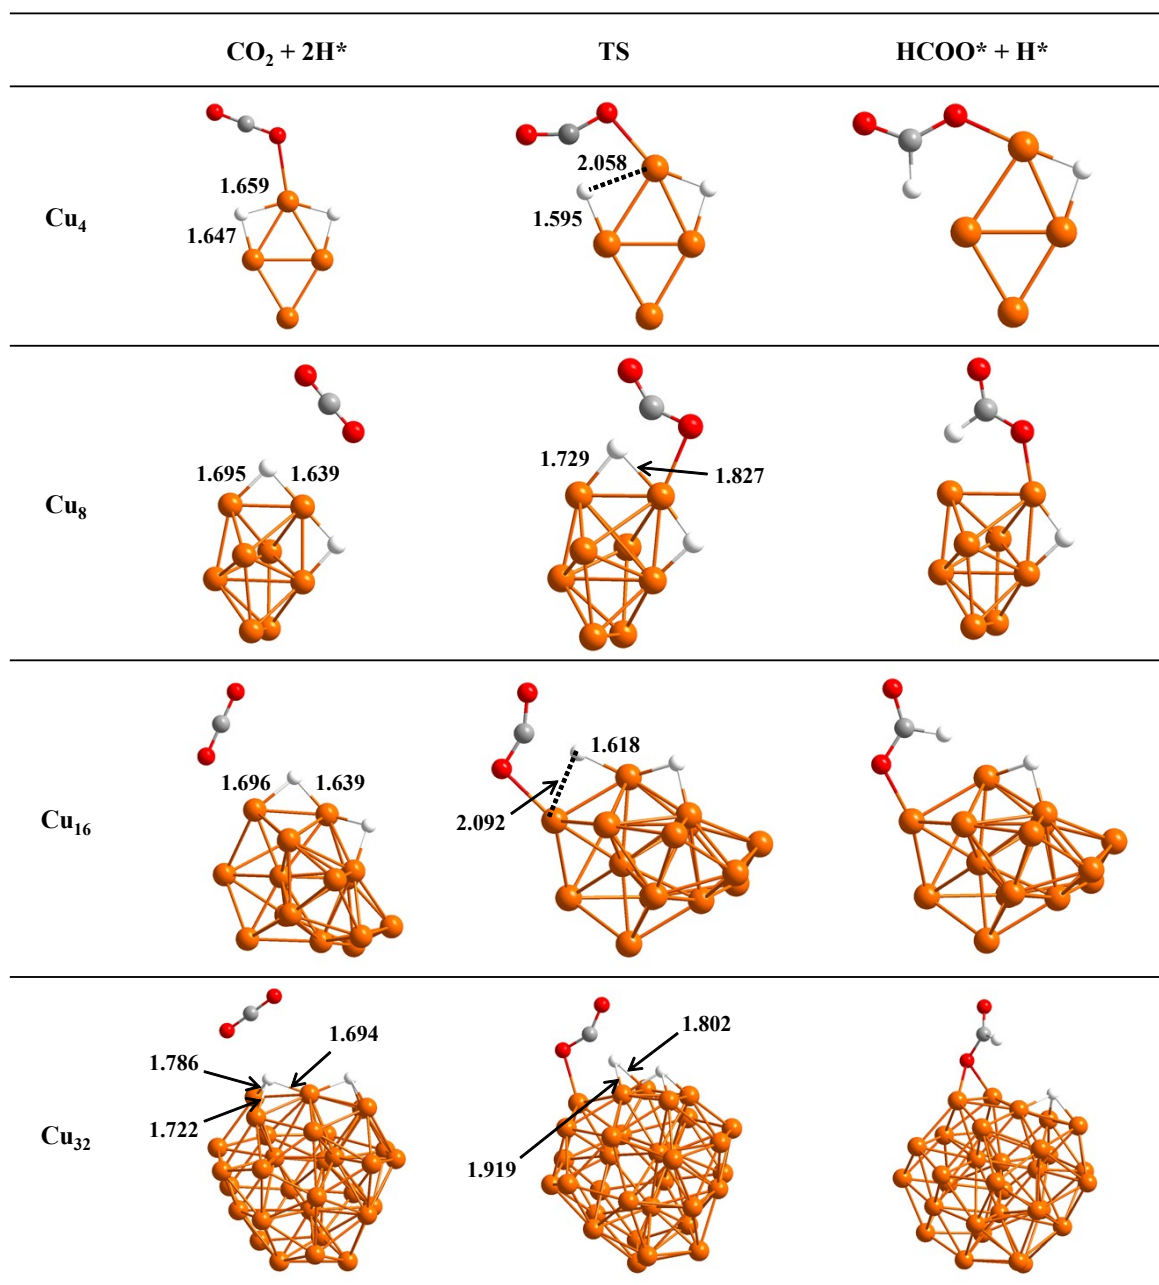

**Figure S4.** The optimized structures of  $\text{CO}_2$  hydrogenation on non-confined  $\text{Cu}_n$  ( $n = 4, 8, 16, 32$ ) with key bond distance ( $\text{\AA}$ ), where H C, O and Cu are in white, grey, red and orange, respectively.

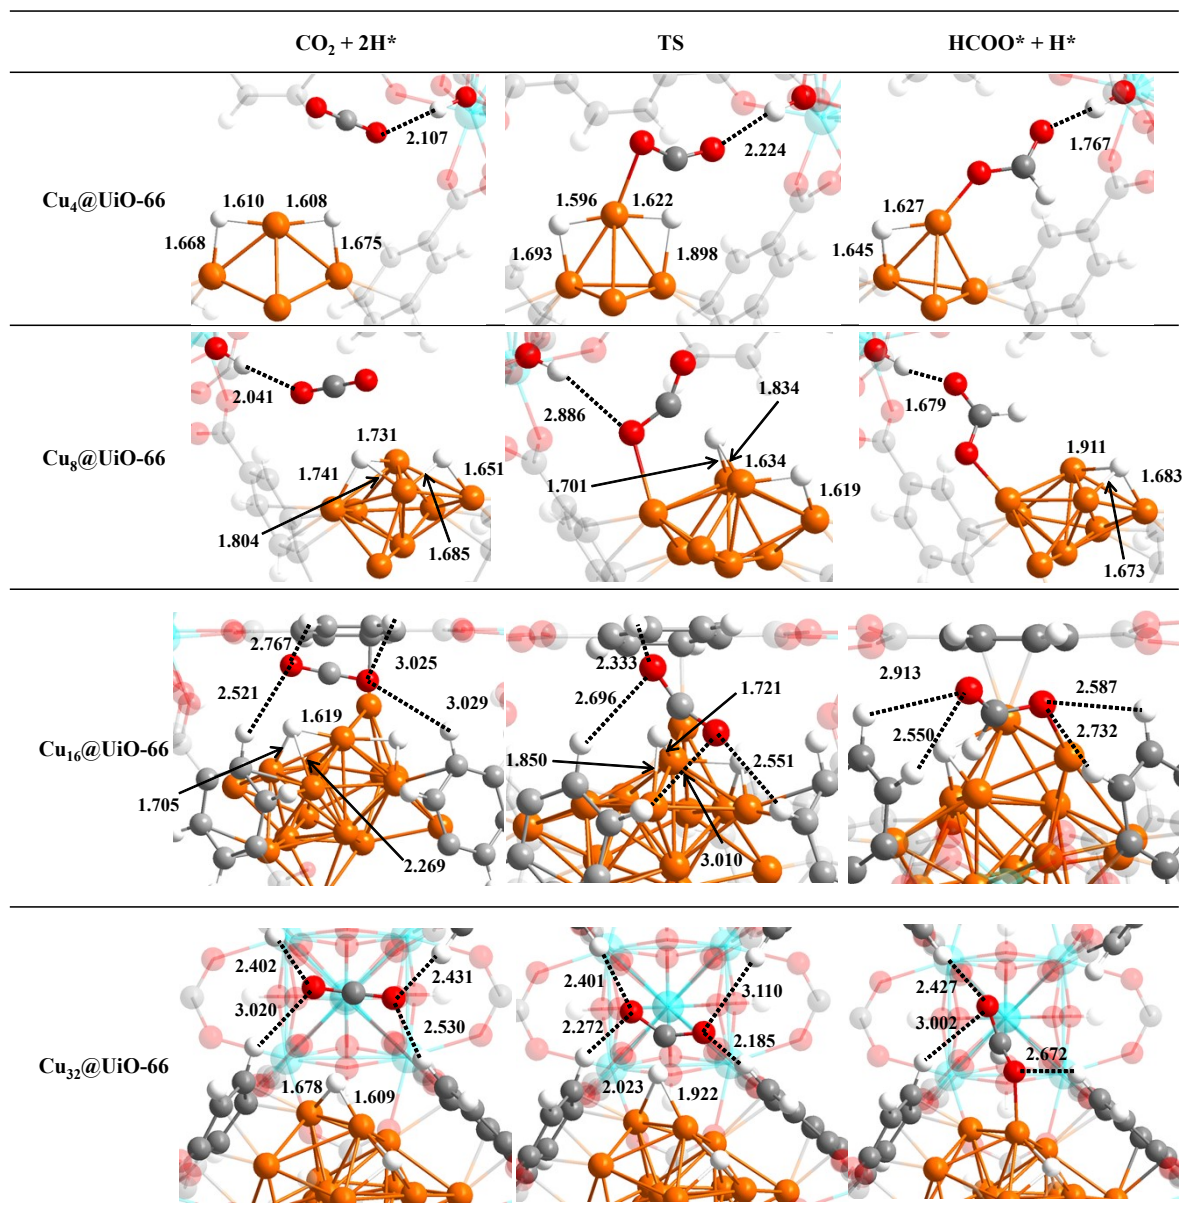

**Figure S5.** The optimized structures of  $\text{CO}_2$  hydrogenation on UiO-66-confined  $\text{Cu}_n$  ( $n = 4, 8, 16, 32$ ) with key bond distance (Å), where H, C, O, Zr and Cu are in white, grey, red, turquoise and orange, respectively.



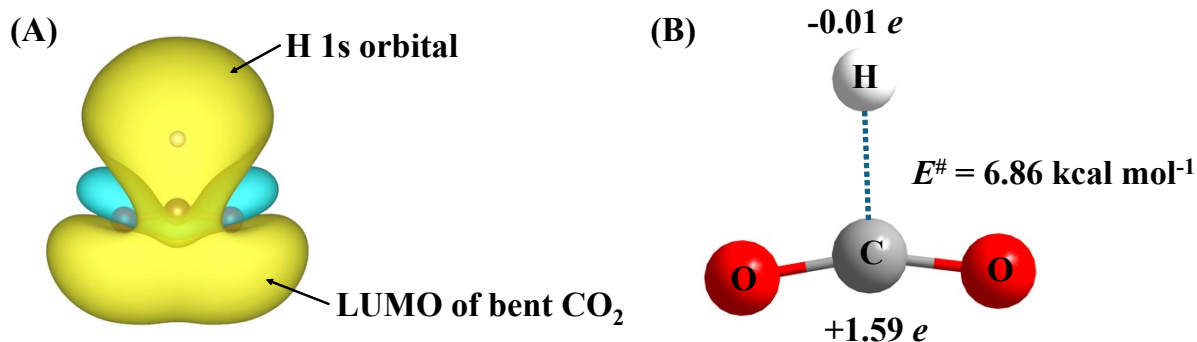

**Figure S6.** (A) Overlap between H 1s orbital and lowest unoccupied molecular orbital (LUMO) of bent CO<sub>2</sub>; (B) Optimized structure of CO<sub>2</sub> hydrogenation to HCOO in gas phase, where charge state of C and H atoms are labeled, *E*<sup>#</sup> is the activation barrier in kcal mol<sup>-1</sup>

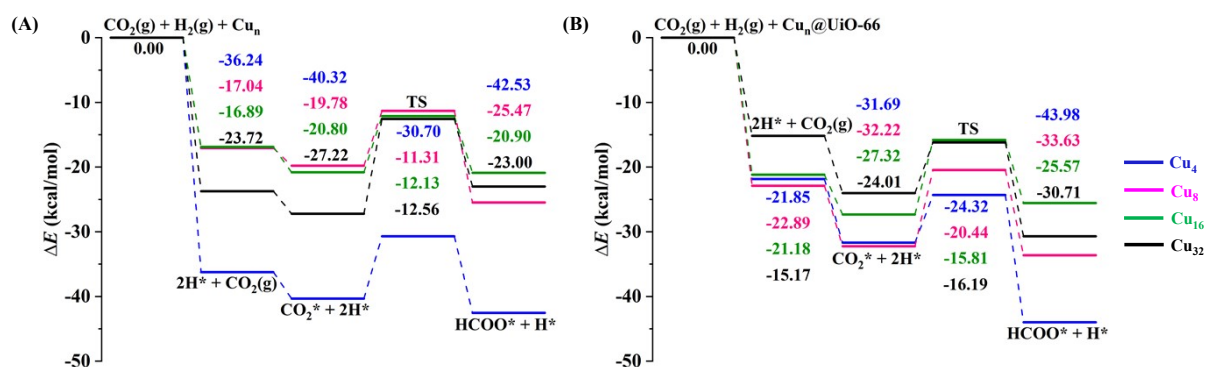

**Figure S7.**  $\Delta E$  profiles for CO<sub>2</sub> hydrogenation to HCOO on (A) non-confined and (B) UiO-66-confined Cu clusters.

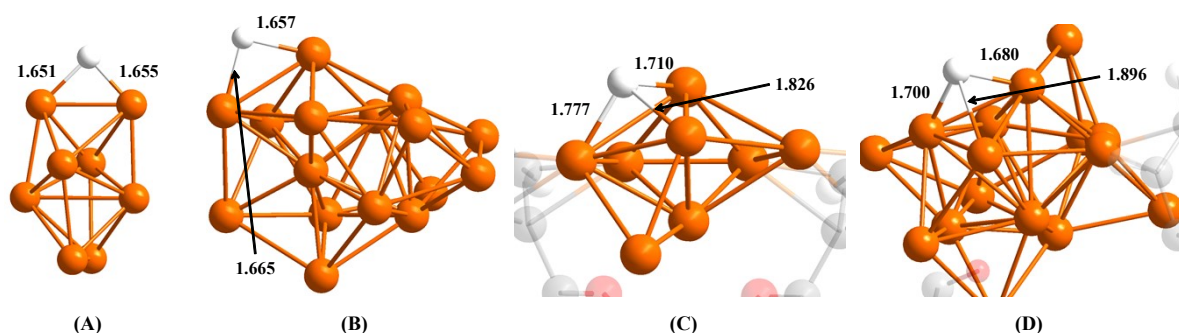

**Figure S8.** The optimized structures of H\* on Cu<sub>8</sub>, Cu<sub>16</sub>, Cu<sub>8</sub>@UiO-66 and Cu<sub>16</sub>@UiO-66 with key bond distance (Å), where corresponding adsorption energy of H\* ( $\Delta E_H$ ) is presented in Table S1.

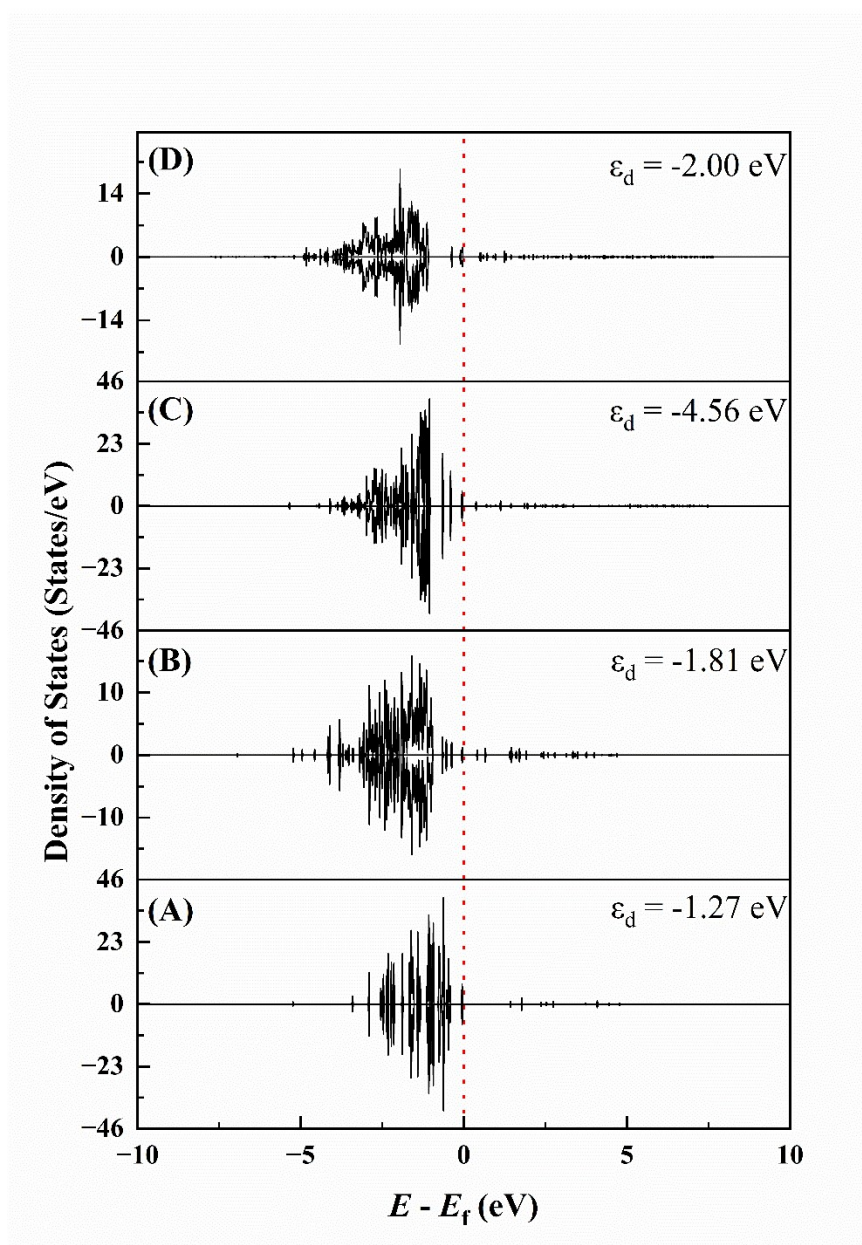

**Figure S9.** The local density of 3d states of adsorption sites for H\* including corresponding d-band center ( $\epsilon_d$ ) on (A) Cu<sub>8</sub>, (B) Cu<sub>16</sub>, (C) Cu<sub>8</sub>@UiO-66 and (D) Cu<sub>16</sub>@UiO-66, respectively.



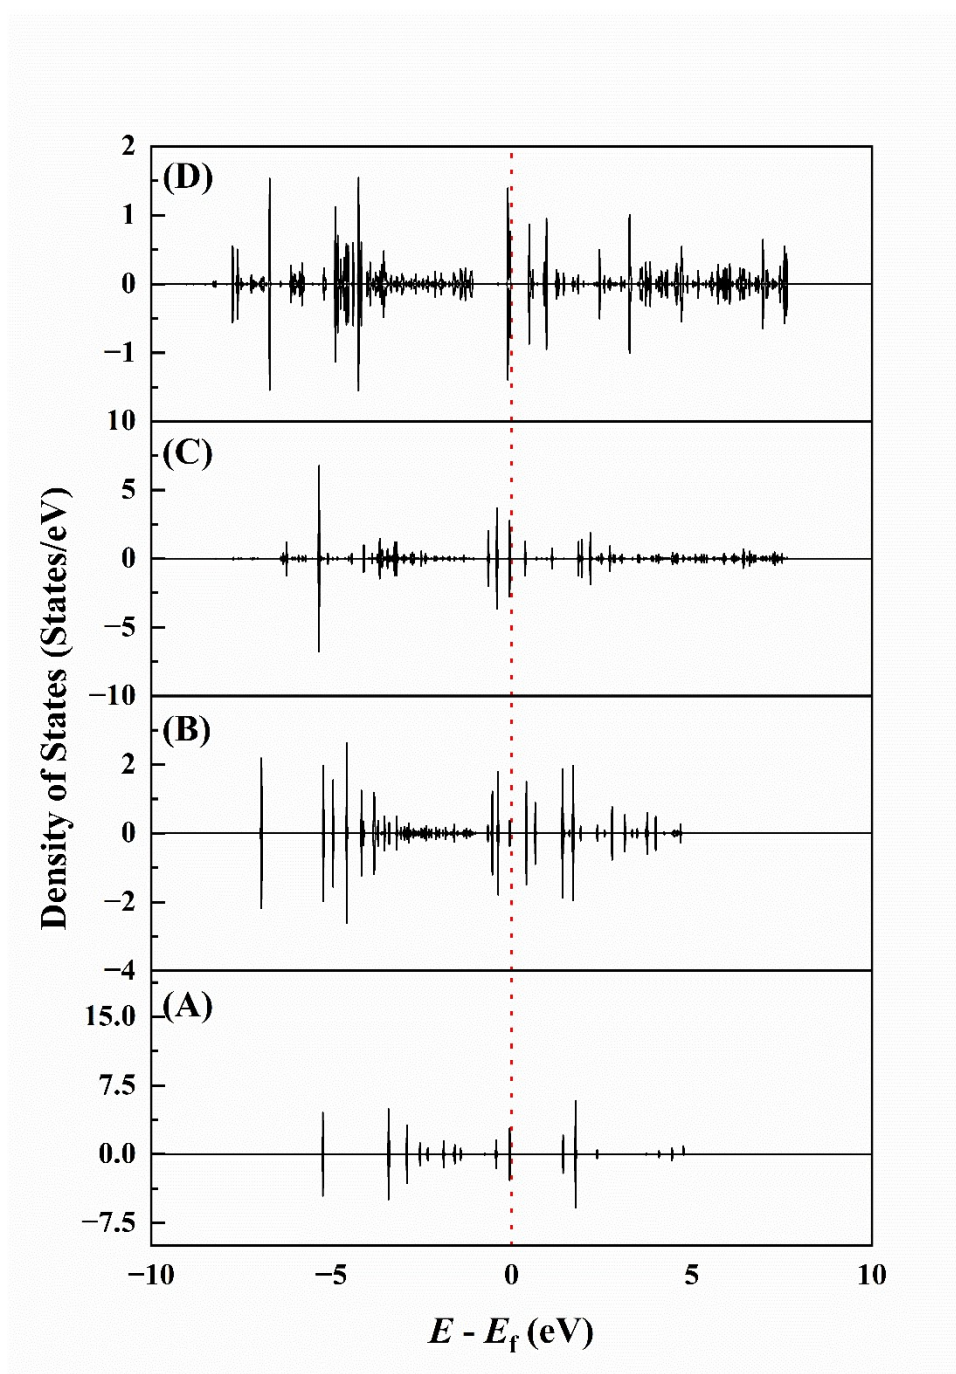

**Figure S10.** The local density of 4s states of adsorption sites for H\* on (A) Cu<sub>8</sub>, (B) Cu<sub>16</sub>, (C) Cu<sub>8</sub>@UiO-66 and (D) Cu<sub>16</sub>@UiO-66, respectively.

## S2. Selection of active sites

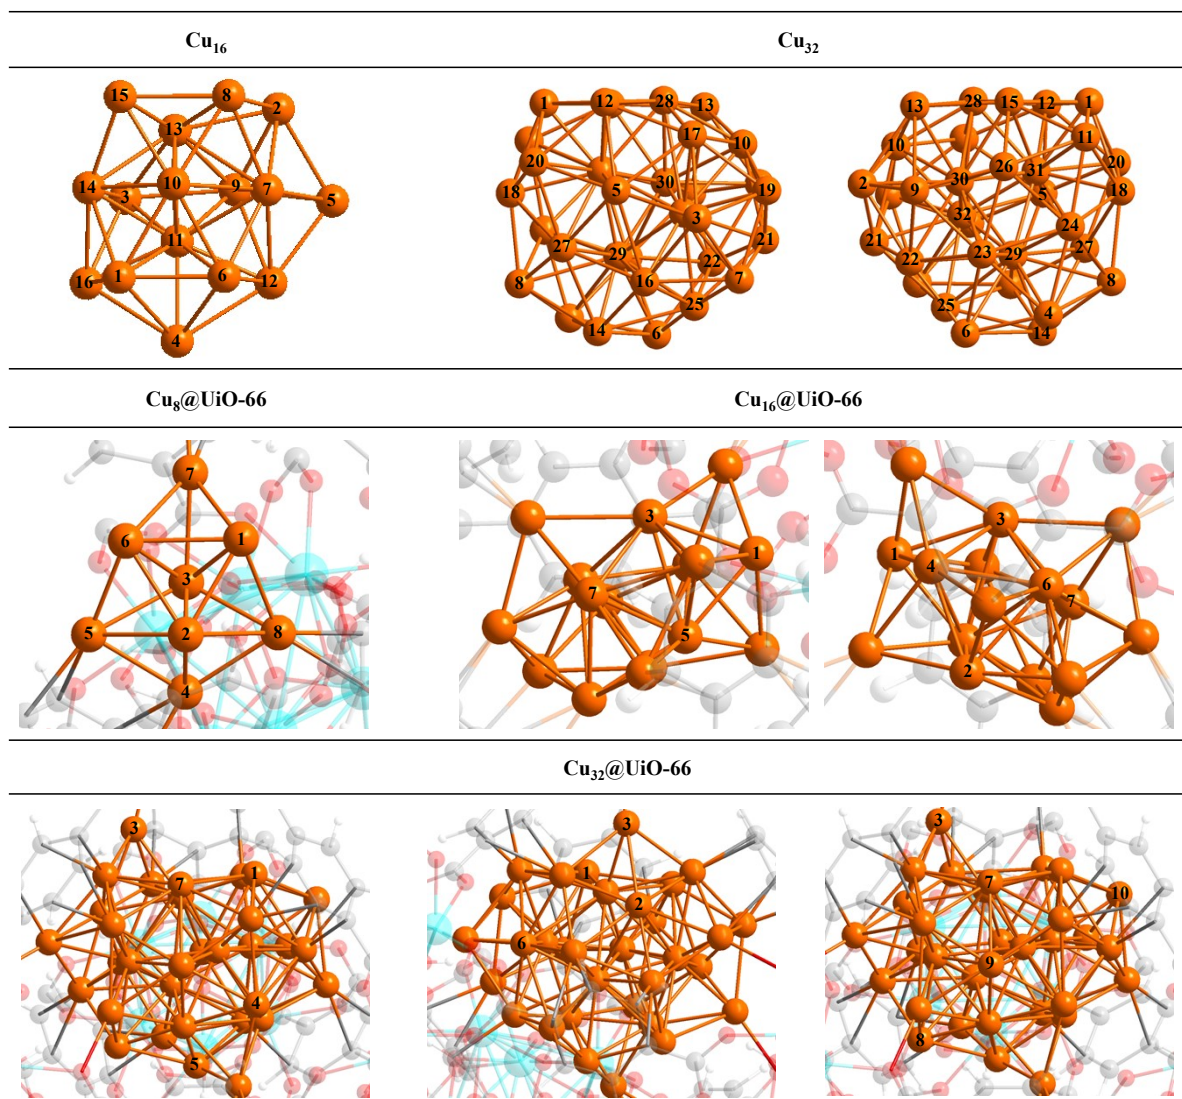

**Figure S11.** Graphical illustration of Cu sites (CS) assigned for  $\text{H}_2^*$  on  $\text{Cu}_{16}$ ,  $\text{Cu}_{32}$ ,  $\text{Cu}_8@\text{UiO-66}$ ,  $\text{Cu}_{16}@\text{UiO-66}$  and  $\text{Cu}_{32}@\text{UiO-66}$ , respectively.

In order for an effective C-H interaction, selection of active site for  $\text{CO}_2$  hydrogenation is limited to the location of dissociative chemisorption of  $\text{H}_2$  reported in our previous study.<sup>1</sup> The initial state of which is  $\text{H}_2^*$ . We therefore performed calculations of  $\text{H}_2^*$  on available Cu site (CS) and accordingly computed its  $\Delta E$  in determining which CS was chosen for  $\text{H}_2$  dissociation.  $\text{Cu}_4$  and  $\text{Cu}_8$  were not examined since their optimal CSs on  $\text{H}_2$  dissociation have already been reported by other studies.<sup>2-5</sup> The initial structure of  $\text{H}_2^*$  on  $\text{Cu}_4$  and  $\text{Cu}_8$  were

therefore sourced from the literature. On Cu<sub>16</sub>, all CSs have been assessed (**Figure S11**) and CS8 presents the greatest  $\Delta E$  of H<sub>2</sub>\* in contrast to that of other CSs (**Table S2**). On Cu<sub>32</sub>, CS1 – CS28 were examined as CS29 – CS32 are highly packed by surrounding CSs and located at the core of cluster, resulting in zero activity to H<sub>2</sub> adsorption. As demonstrated in **Table S2**, CS21 is the optimal site for reaction. For Cu<sub>4</sub>@UiO-66, only one CS is available to H<sub>2</sub> adsorption as H<sub>2</sub>\* on the rest of three, which are bonded with UiO-66 as presented in **Figure 1e**, is preferably located at the nearby of window site of UiO-66. For Cu<sub>8</sub>@UiO-66 (**Figure S11**), CS6 show the greatest  $\Delta E$  of H<sub>2</sub>\* (**Table S2**). CS4 – CS5 and CS7 – CS8, which are in interfacial interactions with UiO-66, as well as CS3 that is highly coordinated by other CSs, show relatively lower adsorption energy in contrast to CS6 (**Table S2**). Therefore, CSs featured with similar characteristics were excluded in the calculations when we came to UiO-66-confined Cu<sub>16</sub> and Cu<sub>32</sub>, where seven and ten CSs were examined, respectively (**Figure S11**). According to **Table S2**, CS2 and CS10 are the results of selection of active site on Cu<sub>16</sub>@UiO-66 and Cu<sub>32</sub>@UiO-66.

**Table S2.** Adsorption energies ( $\Delta E$ s) of H<sub>2</sub>\* on Cu sites (CS) of Cu<sub>16</sub>, Cu<sub>32</sub>, Cu<sub>8</sub>@UiO-66, Cu<sub>16</sub>@UiO-66 and Cu<sub>32</sub>@UiO-66, where CS are Cu sites shown in **Figure S11**.

| Catalyst<br>$\Delta E$ (kcal mol <sup>-1</sup> ) | Cu <sub>16</sub> | Cu <sub>32</sub> | Cu <sub>8</sub> @UiO-66 | Cu <sub>16</sub> @UiO-66 | Cu <sub>32</sub> @UiO-66 |
|--------------------------------------------------|------------------|------------------|-------------------------|--------------------------|--------------------------|
| CS1                                              | -4.64            | -7.73            | -3.05                   | -2.64                    | 0.04                     |
| CS2                                              | -5.99            | -10.39           | -5.01                   | -9.09                    | -0.34                    |
| CS3                                              | -1.52            | -7.66            | -2.70                   | -5.83                    | -3.58                    |
| CS4                                              | -3.50            | -10.05           | -3.04                   | -5.15                    | -3.69                    |
| CS5                                              | -3.94            | -7.14            | -1.00                   | -0.97                    | -4.66                    |
| CS6                                              | -4.71            | -5.83            | -6.63                   | -3.65                    | 2.69                     |
| CS7                                              | -3.95            | -8.55            | -2.53                   | -2.11                    | 2.07                     |
| CS8                                              | -11.65           | -9.12            | -1.13                   |                          | -0.48                    |
| CS9                                              | -7.55            | -8.34            |                         |                          | -3.77                    |
| CS10                                             | -6.24            | -6.23            |                         |                          | -5.21                    |
| CS11                                             | -3.56            | -7.94            |                         |                          |                          |
| CS12                                             | -4.79            | -9.04            |                         |                          |                          |
| CS13                                             | -2.16            | -9.08            |                         |                          |                          |
| CS14                                             | -11.38           | -6.39            |                         |                          |                          |

|      |       |        |
|------|-------|--------|
| CS15 | -8.39 | -4.70  |
| CS16 | -2.12 | -8.07  |
| CS17 |       | -4.31  |
| CS18 |       | -3.60  |
| CS19 |       | -4.82  |
| CS20 |       | -9.26  |
| CS21 |       | -11.62 |
| CS22 |       | -8.20  |
| CS23 |       | -6.21  |
| CS24 |       | -6.39  |
| CS25 |       | -9.78  |
| CS26 |       | -7.76  |
| CS27 |       | -10.77 |
| CS28 |       | -11.40 |

---

### S3. Validations of input parameter

For Cu clusters, which are defined as non-periodic systems, are calculated based on  $1 \times 1 \times 1$  k-point scheme in precluding spurious interactions from periodic images, thus improving the accuracy on describing their localized electronic states.<sup>6</sup> By contrast, periodicity is confirmed on UiO-66 composites. Herein, this section aims to search for acceptable k-point grid on sampling their Brillouin zone.  $\text{Cu}_4@\text{UiO-66}$  was calculated at  $1 \times 1 \times 1$ ,  $2 \times 2 \times 2$ ,  $3 \times 3 \times 3$ ,  $4 \times 4 \times 4$ ,  $5 \times 5 \times 5$ ,  $6 \times 6 \times 6$ ,  $7 \times 7 \times 7$ , respectively. As demonstrated by **Figure S12**, less-than  $0.1 \text{ kcal mol}^{-1}$  derivation between electronic energies at  $1 \times 1 \times 1$  and  $7 \times 7 \times 7$  is presented, where  $\Delta E_{\text{diff}}$  is the energy difference of various k-point grid using electronic energy computed at  $1 \times 1 \times 1$  as benchmark.

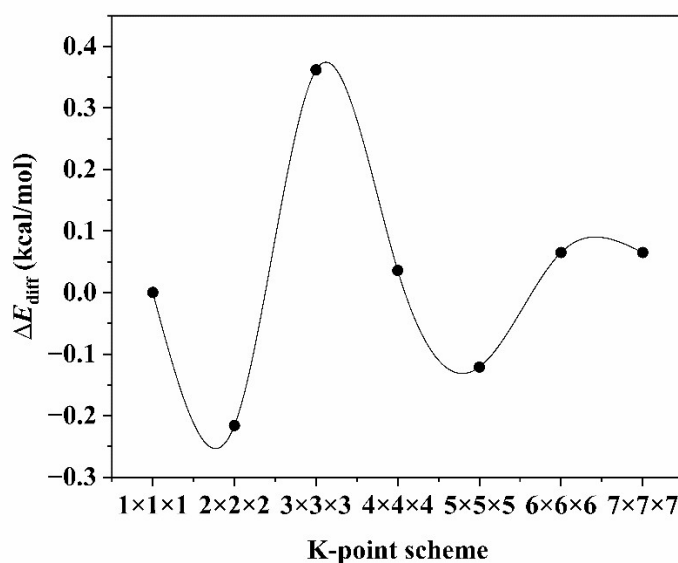

**Figure S12.**  $\Delta E_{\text{diff}}$  based on  $1 \times 1 \times 1$  along various k-point scheme for  $\text{Cu}_4@\text{UiO-66}$

## S4. References

- (1) Ye, Z.; Xie, W.; Chen, H.; Kawi, S. How UiO-66 Confinement Tunes Copper Catalytic Activity on H<sub>2</sub> Dissociation? *Mol. Catal.* **2025**, *586*, 115451. <https://doi.org/10.1016/j.mcat.2025.115451>.
- (2) Guvelioglu, G. H.; Ma, P.; He, X.; Forrey, R. C.; Cheng, H. Evolution of Small Copper Clusters and Dissociative Chemisorption of Hydrogen. *Phys. Rev. Lett.* **2005**, *94* (2), 026103. <https://doi.org/10.1103/PhysRevLett.94.026103>.
- (3) Guvelioglu, G. H.; Ma, P.; He, X.; Forrey, R. C.; Cheng, H. First Principles Studies on the Growth of Small Cu Clusters and the Dissociative Chemisorption of H<sub>2</sub>. *Phys. Rev. B* **2006**, *73* (15), 155436. <https://doi.org/10.1103/PhysRevB.73.155436>.
- (4) Zhao, S.; Tian, X.; Liu, J.; Ren, Y.; Ren, Y.; Wang, J. Density Functional Study of Molecular Hydrogen Adsorption on Small Gold–Copper Binary Clusters. *J. Clust. Sci.* **2015**, *26* (2), 491–503. <https://doi.org/10.1007/s10876-015-0848-z>.
- (5) Lushchikova, O. V.; Tahmasbi, H.; Reijmer, S.; Platte, R.; Meyer, J.; Bakker, J. M. IR Spectroscopic Characterization of H<sub>2</sub> Adsorption on Cationic Cu<sub>*n*</sub><sup>+</sup> (*n* = 4–7) Clusters. *J. Phys. Chem. A* **2021**, *125* (14), 2836–2848. <https://doi.org/10.1021/acs.jpca.0c11527>.
- (6) Schäfer, T.; Gallo, A.; Irmeler, A.; Hummel, F.; Grüneis, A. Surface Science Using Coupled Cluster Theory via Local Wannier Functions and In-RPA-Embedding: The Case of Water on Graphitic Carbon Nitride. *J. Chem. Phys.* **2021**, *155* (24), 244103. <https://doi.org/10.1063/5.0074936>.
